# Supplementary material for: Unveiling Cacao Rootstock-Genotypes with Potential Use in the Mitigation of Cadmium Bioaccumulation
Source: MDPI journal article supplement (doi:10.3390/plants12162941), 2023-08-14
Supplement: s1 [file s1]

**Unveiling Cacao Rootstock-genotypes with Potential Use in the Mitigation of Cadmium  
Bioaccumulation**

Donald A. Galvis, Yeirme Y. Jaimes-Suárez, Rosalba Ruiz, Jairo Rojas-Molina, Clara E. León-Moreno  
and Fabricio Eulalio Leite Carvalho

**SUPPLEMENTARY MATERIAL**

**2023**

**Table S1.** Chemical features of the substrate employed in the research.

| Analytical determination                  | Value | Unit                 | Analytical determination      | Value | Unit                 |
|-------------------------------------------|-------|----------------------|-------------------------------|-------|----------------------|
| Cadmium (Cd) **                           | 0.64  | mg.kg <sup>-1</sup>  | Acidity (Al+H) cmol(+)/kg KCl | N.D   | cmol(+)/kg           |
| pH (1:2.5)                                | 6     | pH units             | (Al) Interchangeable          | N.D   | cmol(+)/kg           |
| Electric conductivity (EC)                | 0.08  | dS/m                 | Calcium (Ca) *                | 3.99  | cmol(+)/kg           |
| Organic material (OM) Walkey & Black      | 0.25  | g/100g               | Magnesium (Mg) *              | 0.35  | cmol(+)/kg           |
| Phosphorus (P) Bray II *                  | 41.68 | C                    | Potassium (K) *               | 0.1   | cmol(+)/kg           |
| Sulfur (S) *                              | 2.61  | mg. kg <sup>-1</sup> | Iron (Fe) olsen *             | 37.41 | mg. kg <sup>-1</sup> |
| Effective cation exchange capacity (ECEC) | 4.53  | cmol(+)/kg           | Copper (Cu) Olsen *           | <1.0  | mg. kg <sup>-1</sup> |
| Boron (B) *                               | 0.18  | mg. kg <sup>-1</sup> | Manganese (Mn) Olsen *        | 14.18 | mg. kg <sup>-1</sup> |
| Zinc (Zn) Olsen *                         | 1.14  | mg. kg <sup>-1</sup> |                               |       |                      |

\* Metal available values

\*\* Pseudototal value

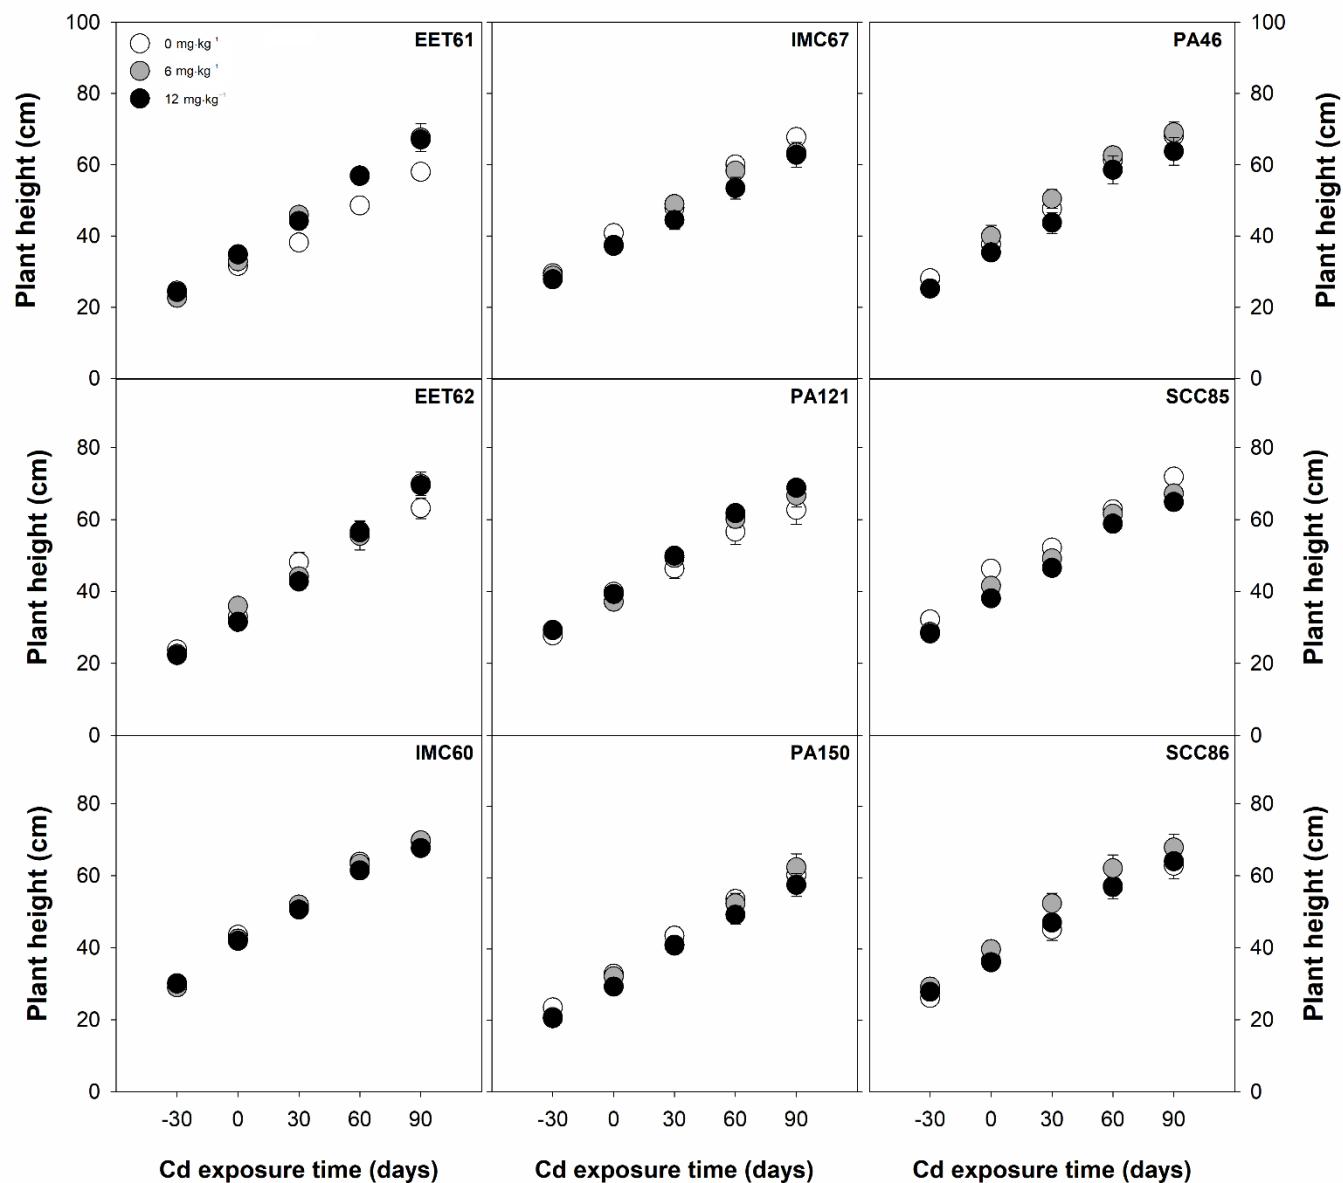

**Figure S1.** Height growth curves (cm) in different genotypes of cacao rootstock exposed to different doses of  $\text{CdCl}_2$  contamination (0, 6, and 12  $\text{mg.kg}^{-1}$ ) for up to 90 days. Circles represent the average and bars indicate the standard error of the mean ( $n = 9$ ).

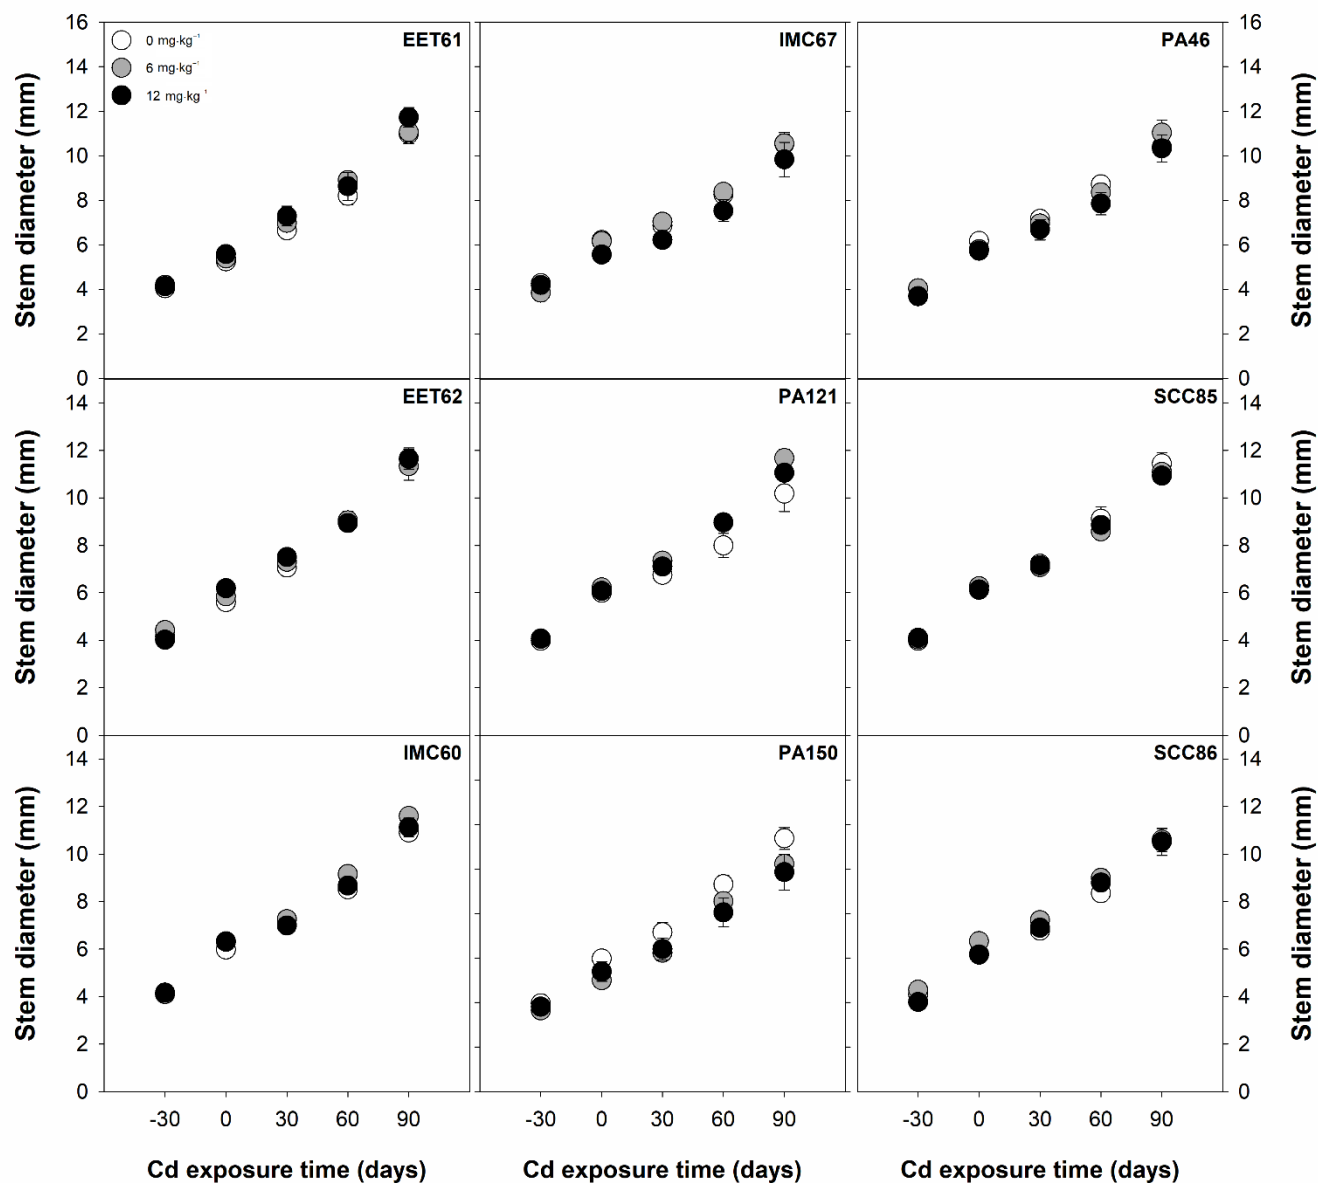

**Figure S2.** Stem diameter growth curves (mm) in different genotypes of cacao rootstock exposed to different doses of CdCl<sub>2</sub> contamination (0, 6, and 12 mg.kg<sup>-1</sup>) for up to 90 days. Circles represent the average and bars indicate the standard error of the mean ( $n = 9$ ).

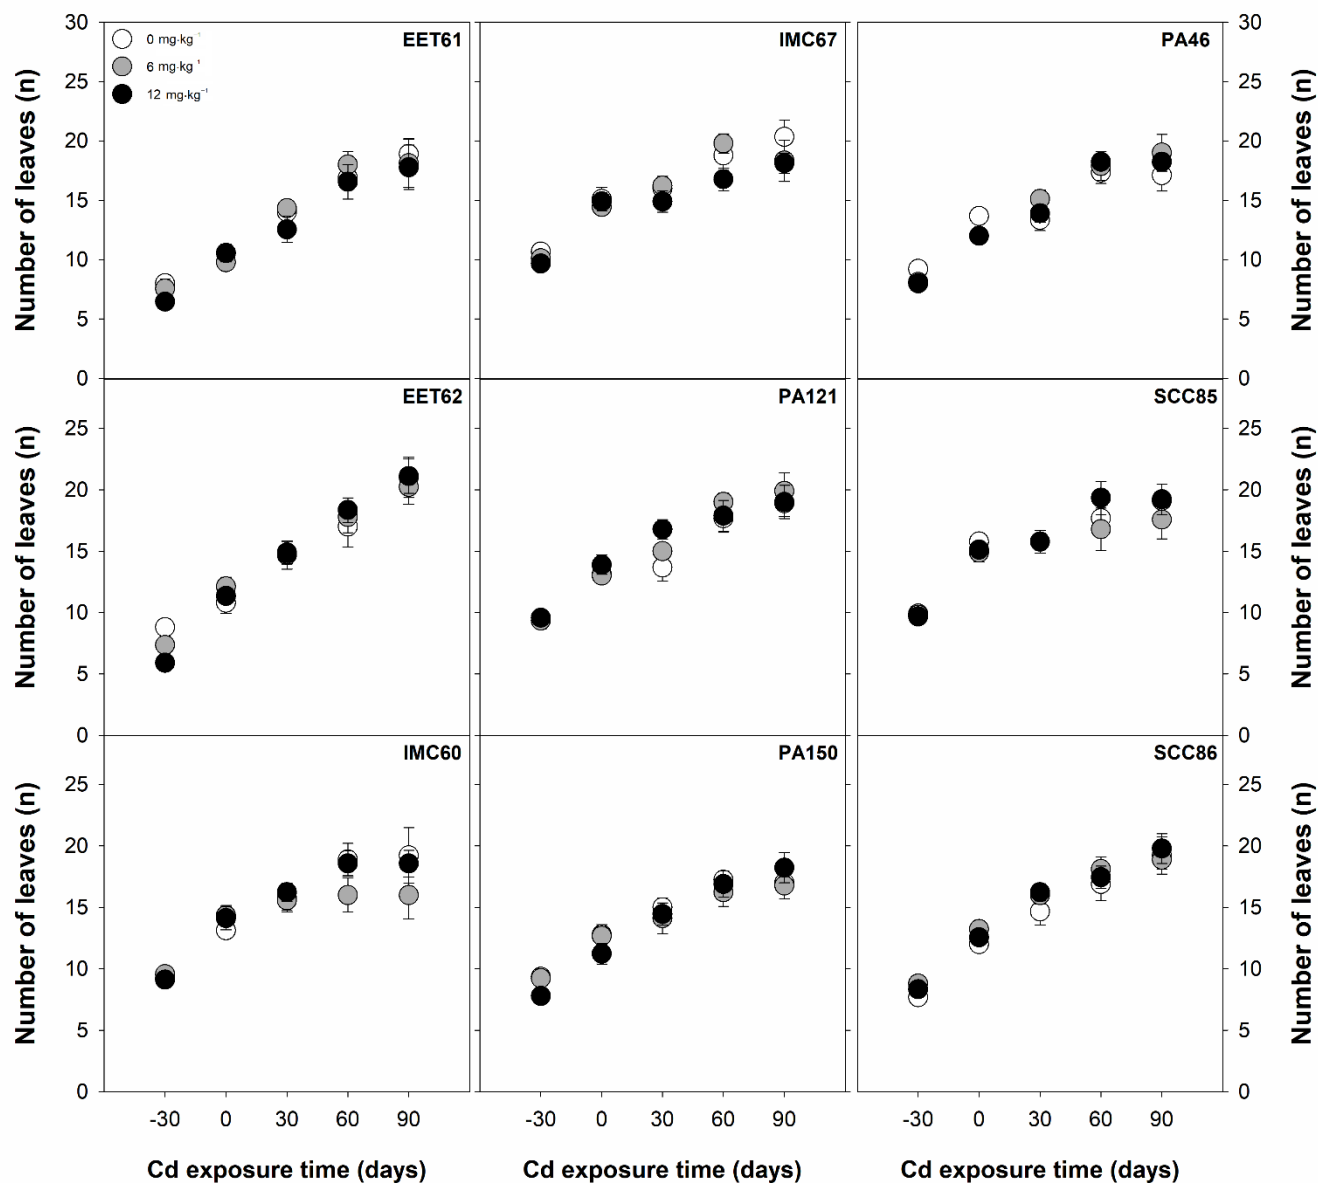

**Figure S3.** The number of leaves-based growth curves (n) in different genotypes of cacao rootstock exposed to different doses of CdCl<sub>2</sub> contamination (0, 6, and 12 mg.kg<sup>-1</sup>) for up to 90 days. Circles represent the average and bars indicate the standard error of the mean (n = 9).

**Table S2.** Leaf, stem, shoot, and root dry weight (g) in different cacao rootstock genotypes. Asterisks represent significant differences according to Student's T-test (\*,  $p < 0.05$ ; \*\*,  $p < 0.01$ ) as comparing each Cd treatment with the control within the same exposure time ( $n=3$ ).

| Genotype | Cd treatment           | Time of exposure (days) | Leaf dry weight <sup>a</sup> |      |          | Stem dry weight <sup>a</sup> |      |          | Root dry weight <sup>a</sup> |      |          | Shoot dry weight <sup>a</sup> |      |          |
|----------|------------------------|-------------------------|------------------------------|------|----------|------------------------------|------|----------|------------------------------|------|----------|-------------------------------|------|----------|
|          |                        |                         | AVR                          | SEM  | <i>p</i> | AVR                          | SEM  | <i>p</i> | AVR                          | SEM  | <i>P</i> | AVR                           | SEM  | <i>p</i> |
| EET61    | 0 mg.kg <sup>-1</sup>  | 30                      | 4.61                         | 0.21 |          | 2.79                         | 0.15 |          | 2.43                         | 0.13 |          | 7.40                          | 0.28 |          |
|          |                        | 60                      | 5.25                         | 0.18 |          | 4.12                         | 0.15 |          | 4.32                         | 0.27 |          | 9.37                          | 0.23 |          |
|          |                        | 90                      | 6.05                         | 0.41 |          | 5.24                         | 0.44 |          | 4.24                         | 0.30 |          | 11.29                         | 0.71 |          |
|          | 6 mg.kg <sup>-1</sup>  | 30                      | 4.28                         | 0.19 |          | 3.36                         | 0.20 | *        | 3.20                         | 0.15 | **       | 7.64                          | 0.30 |          |
|          |                        | 60                      | 4.80                         | 0.37 |          | 4.69                         | 0.37 |          | 3.31                         | 0.37 | *        | 9.49                          | 0.59 |          |
|          |                        | 90                      | 5.28                         | 0.32 |          | 5.50                         | 0.21 |          | 3.56                         | 0.29 |          | 10.78                         | 0.37 |          |
|          | 12 mg.kg <sup>-1</sup> | 30                      | 5.32                         | 0.18 |          | 3.36                         | 0.16 | *        | 2.58                         | 0.10 |          | 8.68                          | 0.29 | *        |
|          |                        | 60                      | 6.04                         | 0.27 | *        | 3.73                         | 0.17 |          | 2.98                         | 0.13 | **       | 9.78                          | 0.39 |          |
|          |                        | 90                      | 4.94                         | 0.23 | **       | 3.86                         | 0.12 | *        | 3.83                         | 0.33 |          | 8.80                          | 0.33 | **       |
| EET62    | 0 mg.kg <sup>-1</sup>  | 30                      | 5.70                         | 0.30 |          | 2.84                         | 0.31 |          | 2.72                         | 0.36 |          | 8.53                          | 0.58 |          |
|          |                        | 60                      | 6.30                         | 0.40 |          | 4.95                         | 0.28 |          | 3.16                         | 0.24 |          | 11.24                         | 0.64 |          |
|          |                        | 90                      | 6.72                         | 0.48 |          | 5.47                         | 0.37 |          | 5.09                         | 0.29 |          | 12.19                         | 0.71 |          |
|          | 6 mg.kg <sup>-1</sup>  | 30                      | 5.42                         | 0.24 |          | 3.62                         | 0.18 |          | 2.72                         | 0.19 |          | 9.05                          | 0.33 |          |
|          |                        | 60                      | 5.47                         | 0.37 |          | 5.06                         | 0.26 |          | 3.96                         | 0.26 | **       | 10.53                         | 0.54 |          |
|          |                        | 90                      | 6.09                         | 0.36 |          | 5.43                         | 0.21 |          | 4.29                         | 0.21 | *        | 11.52                         | 0.52 |          |
|          | 12 mg.kg <sup>-1</sup> | 30                      | 4.91                         | 0.18 | *        | 3.42                         | 0.20 |          | 2.62                         | 0.15 |          | 8.33                          | 0.29 |          |
|          |                        | 60                      | 4.87                         | 0.28 | *        | 4.94                         | 0.26 |          | 4.15                         | 0.26 | *        | 9.80                          | 0.40 |          |
|          |                        | 90                      | 5.26                         | 0.13 | **       | 5.04                         | 0.23 |          | 4.31                         | 0.15 | *        | 10.30                         | 0.32 | **       |
| IMC60    | 0 mg.kg <sup>-1</sup>  | 30                      | 5.01                         | 0.45 |          | 2.97                         | 0.22 |          | 2.19                         | 0.20 |          | 7.98                          | 0.63 |          |
|          |                        | 60                      | 6.67                         | 0.30 |          | 5.34                         | 0.43 |          | 3.99                         | 0.43 |          | 12.01                         | 0.61 |          |
|          |                        | 90                      | 7.17                         | 0.74 |          | 7.80                         | 0.73 |          | 4.73                         | 0.44 |          | 14.97                         | 1.40 |          |
|          | 6 mg.kg <sup>-1</sup>  | 30                      | 5.39                         | 0.36 |          | 3.25                         | 0.15 |          | 2.29                         | 0.21 |          | 8.64                          | 0.41 |          |
|          |                        | 60                      | 6.15                         | 0.41 |          | 5.03                         | 0.20 |          | 3.31                         | 0.23 |          | 11.18                         | 0.55 |          |
|          |                        | 90                      | 6.72                         | 0.30 |          | 7.50                         | 0.36 |          | 4.79                         | 0.28 |          | 14.22                         | 0.51 |          |
|          | 12 mg.kg <sup>-1</sup> | 30                      | 5.15                         | 0.41 |          | 2.95                         | 0.18 |          | 1.82                         | 0.11 |          | 8.10                          | 0.54 |          |
|          |                        | 60                      | 6.47                         | 0.27 |          | 5.55                         | 0.26 |          | 3.41                         | 0.19 |          | 12.02                         | 0.38 |          |
|          |                        | 90                      | 7.13                         | 0.28 |          | 6.73                         | 0.34 |          | 5.49                         | 0.31 |          | 13.86                         | 0.38 |          |
| IMC67    | 0 mg.kg <sup>-1</sup>  | 30                      | 5.43                         | 0.40 |          | 2.80                         | 0.25 |          | 1.89                         | 0.17 |          | 8.22                          | 0.59 |          |
|          |                        | 60                      | 7.13                         | 0.38 |          | 4.57                         | 0.37 |          | 3.30                         | 0.27 |          | 11.70                         | 0.72 |          |
|          |                        | 90                      | 7.16                         | 0.51 |          | 6.87                         | 0.61 |          | 4.45                         | 0.47 |          | 14.03                         | 1.00 |          |
|          | 6 mg.kg <sup>-1</sup>  | 30                      | 4.90                         | 0.41 |          | 2.38                         | 0.26 |          | 1.89                         | 0.18 |          | 7.28                          | 0.63 |          |
|          |                        | 60                      | 5.95                         | 0.34 | *        | 4.92                         | 0.26 |          | 3.00                         | 0.19 |          | 10.86                         | 0.42 |          |
|          |                        | 90                      | 6.61                         | 0.27 |          | 6.19                         | 0.28 |          | 4.22                         | 0.33 |          | 12.81                         | 0.44 |          |
|          | 12 mg.kg <sup>-1</sup> | 30                      | 5.41                         | 0.38 |          | 3.14                         | 0.32 |          | 2.82                         | 0.43 |          | 8.56                          | 0.60 |          |
|          |                        | 60                      | 6.52                         | 0.48 |          | 4.66                         | 0.29 |          | 3.20                         | 0.30 |          | 11.18                         | 0.71 |          |
|          |                        | 90                      | 6.94                         | 0.35 |          | 5.77                         | 0.23 |          | 4.67                         | 0.34 |          | 12.71                         | 0.45 |          |
| PA121    | 0 mg.kg <sup>-1</sup>  | 30                      | 5.03                         | 0.37 |          | 3.04                         | 0.13 |          | 2.47                         | 0.17 |          | 8.06                          | 0.46 |          |
|          |                        | 60                      | 6.84                         | 0.41 |          | 5.15                         | 0.39 |          | 3.57                         | 0.25 |          | 12.00                         | 0.73 |          |
|          |                        | 90                      | 6.88                         | 0.27 |          | 8.11                         | 0.73 |          | 6.33                         | 0.29 |          | 14.99                         | 0.88 |          |
|          | 6 mg.kg <sup>-1</sup>  | 30                      | 5.25                         | 0.22 |          | 3.07                         | 0.16 |          | 2.36                         | 0.20 |          | 8.33                          | 0.31 |          |
|          |                        | 60                      | 6.75                         | 0.18 |          | 5.36                         | 0.25 |          | 3.97                         | 0.31 |          | 12.11                         | 0.39 |          |
|          |                        | 90                      | 7.91                         | 0.27 | *        | 7.61                         | 0.33 |          | 5.40                         | 0.32 | *        | 15.52                         | 0.46 |          |
|          | 12 mg.kg <sup>-1</sup> | 30                      | 5.46                         | 0.33 |          | 2.87                         | 0.16 |          | 2.71                         | 0.25 |          | 8.34                          | 0.37 |          |
|          |                        | 60                      | 5.68                         | 0.34 | *        | 4.95                         | 0.40 |          | 3.26                         | 0.35 |          | 10.64                         | 0.63 |          |
|          |                        | 90                      | 5.81                         | 0.35 | *        | 6.40                         | 0.41 |          | 5.79                         | 0.40 |          | 12.21                         | 0.57 | *        |
| PA150    | 0 mg.kg <sup>-1</sup>  | 30                      | 4.62                         | 0.16 |          | 2.80                         | 0.15 |          | 2.43                         | 0.34 |          | 7.42                          | 0.30 |          |
|          |                        | 60                      | 6.18                         | 0.41 |          | 5.24                         | 0.36 |          | 3.78                         | 0.30 |          | 11.42                         | 0.37 |          |
|          |                        | 90                      | 7.68                         | 0.55 |          | 6.68                         | 0.23 |          | 4.45                         | 0.26 |          | 14.36                         | 0.60 |          |
|          | 6 mg.kg <sup>-1</sup>  | 30                      | 5.05                         | 0.23 |          | 3.51                         | 0.28 | *        | 2.33                         | 0.12 |          | 8.55                          | 0.38 | *        |
|          |                        | 60                      | 5.85                         | 0.33 |          | 5.47                         | 0.17 |          | 3.93                         | 0.26 |          | 11.33                         | 0.36 |          |
|          |                        | 90                      | 6.52                         | 0.54 |          | 5.61                         | 0.42 | *        | 4.09                         | 0.33 |          | 12.13                         | 0.83 | *        |
|          | 12 mg.kg <sup>-1</sup> | 30                      | 4.70                         | 0.20 |          | 4.01                         | 0.35 | **       | 2.92                         | 0.25 |          | 8.71                          | 0.43 | *        |
|          |                        | 60                      | 6.32                         | 0.38 |          | 5.16                         | 0.24 |          | 3.47                         | 0.42 |          | 11.48                         | 0.39 |          |
|          |                        | 90                      | 5.72                         | 0.18 | *        | 5.40                         | 0.29 | **       | 4.53                         | 0.28 |          | 11.12                         | 0.41 | **       |
| PA46     | Control                | 30                      | 4.99                         | 0.33 |          | 3.70                         | 0.24 |          | 2.13                         | 0.18 |          | 8.69                          | 0.45 |          |
|          |                        | 60                      | 6.33                         | 0.35 |          | 4.54                         | 0.23 |          | 2.93                         | 0.34 |          | 10.87                         | 0.43 |          |
|          |                        | 90                      | 6.74                         | 0.32 |          | 6.86                         | 0.22 |          | 4.72                         | 0.31 |          | 13.60                         | 0.44 |          |
|          | 6 mg.Kg <sup>-1</sup>  | 30                      | 5.05                         | 0.27 |          | 3.16                         | 0.23 |          | 1.87                         | 0.15 |          | 8.21                          | 0.42 |          |
|          |                        | 60                      | 5.94                         | 0.34 |          | 4.57                         | 0.29 |          | 3.22                         | 0.24 |          | 10.51                         | 0.59 |          |
|          |                        | 90                      | 6.11                         | 0.25 |          | 5.49                         | 0.26 | **       | 3.45                         | 0.24 | *        | 11.59                         | 0.45 | **       |
|          | 12 mg.Kg <sup>-1</sup> | 30                      | 5.01                         | 0.44 |          | 3.33                         | 0.20 |          | 2.28                         | 0.14 |          | 8.34                          | 0.62 |          |
|          |                        | 60                      | 5.34                         | 0.33 |          | 4.00                         | 0.26 |          | 2.75                         | 0.31 |          | 9.34                          | 0.42 | *        |
|          |                        | 90                      | 5.74                         | 0.30 | *        | 5.44                         | 0.26 | **       | 3.88                         | 0.27 | *        | 11.18                         | 0.45 | **       |
| SCC85    | 0 mg.kg <sup>-1</sup>  | 30                      | 5.06                         | 0.26 |          | 3.31                         | 0.25 |          | 2.16                         | 0.15 |          | 8.38                          | 0.46 |          |
|          |                        | 60                      | 5.78                         | 0.33 |          | 5.06                         | 0.31 |          | 3.42                         | 0.29 |          | 10.84                         | 0.57 |          |
|          |                        | 90                      | 7.19                         | 0.21 |          | 7.54                         | 0.59 |          | 4.75                         | 0.28 |          | 14.74                         | 0.73 |          |
|          | 6 mg.kg <sup>-1</sup>  | 30                      | 4.61                         | 0.49 |          | 3.00                         | 0.17 |          | 2.09                         | 0.11 |          | 7.61                          | 0.51 |          |
|          |                        | 60                      | 6.38                         | 0.28 |          | 5.09                         | 0.27 |          | 3.52                         | 0.19 |          | 11.47                         | 0.50 |          |
|          |                        | 90                      | 5.97                         | 0.36 | *        | 5.99                         | 0.31 | *        | 4.28                         | 0.26 |          | 11.96                         | 0.58 | **       |
|          | 12 mg.kg <sup>-1</sup> | 30                      | 5.02                         | 0.24 |          | 2.90                         | 0.10 |          | 1.72                         | 0.07 | *        | 7.92                          | 0.32 |          |
|          |                        | 60                      | 5.69                         | 0.20 |          | 4.93                         | 0.18 |          | 3.57                         | 0.35 |          | 10.63                         | 0.34 |          |
|          |                        | 90                      | 5.17                         | 0.24 | **       | 5.37                         | 0.27 | **       | 3.88                         | 0.24 | *        | 10.54                         | 0.42 | **       |
| SCC86    | 0 mg.kg <sup>-1</sup>  | 30                      | 5.67                         | 0.26 |          | 2.88                         | 0.14 |          | 2.18                         | 0.10 |          | 8.55                          | 0.25 |          |
|          |                        | 60                      | 6.71                         | 0.24 |          | 5.16                         | 0.29 |          | 3.39                         | 0.28 |          | 11.87                         | 0.30 |          |
|          |                        | 90                      | 6.70                         | 0.31 |          | 7.48                         | 0.25 |          | 5.93                         | 0.32 |          | 14.18                         | 0.36 |          |
|          | 6 mg.kg <sup>-1</sup>  | 30                      | 5.52                         | 0.17 |          | 3.24                         | 0.31 |          | 2.03                         | 0.14 |          | 8.75                          | 0.34 |          |
|          |                        | 60                      | 6.08                         | 0.34 |          | 5.10                         | 0.26 |          | 3.44                         | 0.43 |          | 11.17                         | 0.43 |          |
|          |                        | 90                      | 6.77                         | 0.43 |          | 6.80                         | 0.23 | *        | 4.27                         | 0.26 | **       | 13.57                         | 0.58 |          |
|          | 12 mg.kg <sup>-1</sup> | 30                      | 5.09                         | 0.21 |          | 2.83                         | 0.18 |          | 2.09                         | 0.10 |          | 7.93                          | 0.34 |          |
|          |                        | 60                      | 6.49                         | 0.23 |          | 4.48                         | 0.15 | *        | 2.99                         | 0.10 |          | 10.97                         | 0.21 | *        |
|          |                        | 90                      | 7.04                         | 0.29 |          | 6.54                         | 0.27 | *        | 4.38                         | 0.24 | **       | 13.58                         | 0.44 |          |

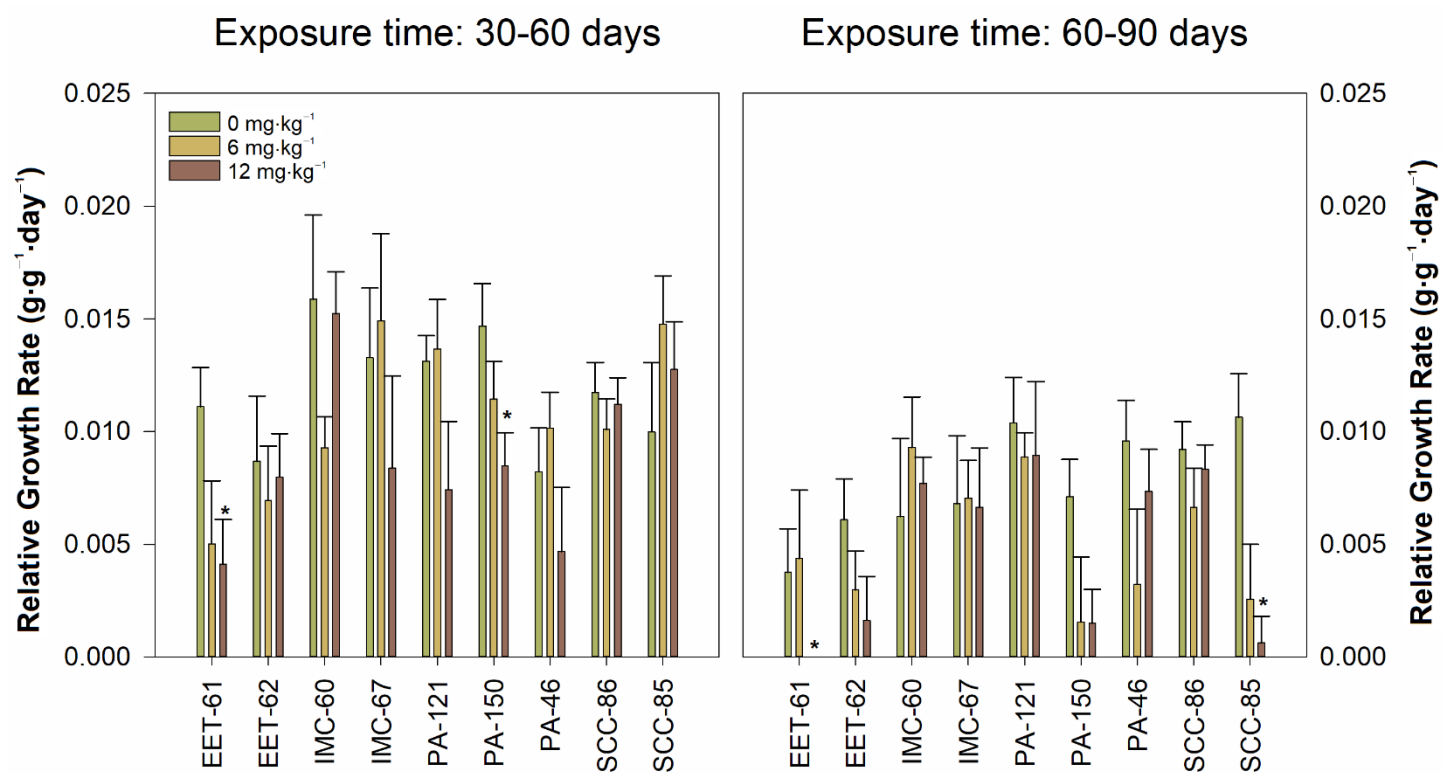

**Figure S4.** Relative growth rate (RGR) of nine cacao rootstock genotypes exposed to different levels (6 and 12 mg.kg<sup>-1</sup>) of cadmium (CdCl<sub>2</sub>) for up to 90 days. The mean values with asterisks\* show significant differences according to Tukey's test ( $p < 0.05$ ).

**Table S3.** Cd content (mg.kg<sup>-1</sup>) in different cacao rootstock genotypes. Asterisks represent significant differences according to Student's T-test (\*, p<0.05; \*\*, p<0.01)) as comparing each Cd treatment with the control within the same exposure time.

| Genotype | Cd treatment           | Time of Exposure (days) | Leaf Cd content <sup>a</sup> |       |    | Stem Cd content <sup>a</sup> |       |    | Root Cd content <sup>a</sup> |       |    | Shoot Cd content <sup>a</sup> |       |    |
|----------|------------------------|-------------------------|------------------------------|-------|----|------------------------------|-------|----|------------------------------|-------|----|-------------------------------|-------|----|
|          |                        |                         | AVR                          | SEM   | p  | AVR                          | SEM   | p  | AVR                          | SEM   | p  | AVR                           | SEM   | P  |
| EET61    | 0 mg.kg <sup>-1</sup>  | 30                      | 0.73                         | 0.16  |    | 0.74                         | 0.11  |    | 1.10                         | 0.31  |    | 0.73                          | 0.13  |    |
|          |                        | 60                      | 0.25                         | 0.02  |    | 0.33                         | 0.02  |    | 0.20                         | 0.03  |    | 0.28                          | 0.02  |    |
|          |                        | 90                      | 1.93                         | 0.07  |    | 0.33                         | 0.06  |    | 0.85                         | 0.14  |    | 1.19                          | 0.09  |    |
|          | 6 mg.kg <sup>-1</sup>  | 30                      | 1.95                         | 0.40  |    | 3.92                         | 1.24  |    | 8.65                         | 1.16  | *  | 2.66                          | 0.24  | *  |
|          |                        | 60                      | 158.2                        | 19.7  | *  | 5.06                         | 2.98  |    | 8.29                         | 1.13  | *  | 81.12                         | 5.88  | ** |
|          |                        | 90                      | 136.75                       | 4.72  | ** | 72.87                        | 4.51  | ** | 9.07                         | 1.81  | *  | 103.85                        | 4.95  | ** |
|          | 12 mg.kg <sup>-1</sup> | 30                      | 4.28                         | 0.64  |    | 3.42                         | 0.26  |    | 17.36                        | 4.84  |    | 3.94                          | 0.48  |    |
|          |                        | 60                      | 86.87                        | 18.1  | *  | 24.43                        | 4.30  | *  | 12.20                        | 2.17  |    | 62.24                         | 9.14  | *  |
|          |                        | 90                      | 255.6                        | 6.65  | ** | 317.0                        | 10.9  | ** | 10.98                        | 0.82  |    | 282.7                         | 5.28  | ** |
| EET62    | 0 mg.kg <sup>-1</sup>  | 30                      | 0.62                         | 0.19  |    | 0.74                         | 0.13  |    | 1.19                         | 0.31  |    | 0.67                          | 0.16  |    |
|          |                        | 60                      | 0.24                         | 0.06  |    | 0.30                         | 0.10  |    | 0.51                         | 0.27  |    | 0.26                          | 0.08  |    |
|          |                        | 90                      | 0.37                         | 0.04  |    | 0.42                         | 0.08  |    | 0.28                         | 0.01  |    | 0.40                          | 0.05  |    |
|          | 6 mg.kg <sup>-1</sup>  | 30                      | 5.61                         | 1.10  | *  | 6.33                         | 1.59  |    | 3.06                         | 0.31  | *  | 5.92                          | 0.78  | *  |
|          |                        | 60                      | 188.2                        | 28.0  | *  | 16.70                        | 2.32  | *  | 48.00                        | 10.3  | *  | 104.3                         | 12.1  | *  |
|          |                        | 90                      | 114.6                        | 14.2  | *  | 40.31                        | 1.79  | ** | 26.10                        | 3.68  | *  | 79.62                         | 6.90  | ** |
|          | 12 mg.kg <sup>-1</sup> | 30                      | 61.75                        | 13.1  | *  | 236.6                        | 50.1  | *  | 95.26                        | 21.5  | *  | 135.2                         | 25.6  | *  |
|          |                        | 60                      | 4.18                         | 1.28  | *  | 55.26                        | 14.1  |    | 51.93                        | 15.1  |    | 29.53                         | 7.04  | *  |
|          |                        | 90                      | 86.90                        | 7.11  |    | 8.95                         | 1.53  | ** | 7.62                         | 0.57  | *  | 48.74                         | 2.67  | *  |
| IMC60    | 0 mg.kg <sup>-1</sup>  | 30                      | 0.69                         | 0.09  |    | 0.85                         | 0.08  |    | 0.73                         | 0.10  |    | 0.75                          | 0.09  |    |
|          |                        | 60                      | 0.29                         | 0.02  |    | 0.26                         | 0.05  |    | 0.38                         | 0.11  |    | 0.27                          | 0.02  |    |
|          |                        | 90                      | 0.42                         | 0.03  |    | 0.34                         | 0.01  |    | 0.35                         | 0.05  |    | 0.38                          | 0.01  |    |
|          | 6 mg.kg <sup>-1</sup>  | 30                      | 5.14                         | 1.38  |    | 47.58                        | 9.06  | *  | 54.65                        | 10.8  | *  | 21.00                         | 3.18  | *  |
|          |                        | 60                      | 4.45                         | 0.08  | ** | 10.06                        | 1.54  | *  | 21.00                        | 1.98  | ** | 6.99                          | 0.71  | ** |
|          |                        | 90                      | 6.46                         | 0.12  | ** | 18.28                        | 2.02  | ** | 8.61                         | 0.93  | ** | 12.68                         | 1.06  | ** |
|          | 12 mg.kg <sup>-1</sup> | 30                      | 25.75                        | 6.14  | *  | 114.12                       | 25.28 |    | 71.64                        | 14.12 |    | 57.38                         | 9.66  |    |
|          |                        | 60                      | 10.51                        | 1.16  | *  | 30.86                        | 6.25  |    | 39.36                        | 9.29  |    | 19.88                         | 3.29  |    |
|          |                        | 90                      | 53.67                        | 8.10  | *  | 78.07                        | 5.60  | *  | 19.92                        | 3.57  |    | 65.88                         | 3.06  | ** |
| IMC67    | 0 mg.kg <sup>-1</sup>  | 30                      | 0.64                         | 0.08  |    | 0.80                         | 0.12  |    | 0.80                         | 0.17  |    | 0.69                          | 0.09  |    |
|          |                        | 60                      | 0.45                         | 0.07  |    | 0.31                         | 0.06  |    | 0.28                         | 0.02  |    | 0.40                          | 0.02  |    |
|          |                        | 90                      | 0.35                         | 0.03  |    | 0.28                         | 0.04  |    | 0.27                         | 0.03  |    | 0.32                          | 0.03  |    |
|          | 6 mg.kg <sup>-1</sup>  | 30                      | 4.99                         | 1.25  | *  | 21.84                        | 4.35  | *  | 78.79                        | 12.87 | *  | 10.34                         | 1.99  | *  |
|          |                        | 60                      | 3.25                         | 0.29  | ** | 6.44                         | 0.67  | ** | 36.21                        | 2.07  | ** | 4.68                          | 0.43  | ** |
|          |                        | 90                      | 6.62                         | 0.54  | ** | 19.00                        | 1.65  | ** | 6.43                         | 0.31  | ** | 12.60                         | 1.03  | ** |
|          | 12 mg.kg <sup>-1</sup> | 30                      | 7.70                         | 1.40  |    | 22.08                        | 2.56  |    | 95.70                        | 17.73 |    | 12.91                         | 1.60  |    |
|          |                        | 60                      | 5.98                         | 1.49  |    | 12.75                        | 2.09  | *  | 57.04                        | 12.56 |    | 8.78                          | 1.61  |    |
|          |                        | 90                      | 8.09                         | 0.53  |    | 56.18                        | 6.27  | *  | 12.52                        | 0.82  | *  | 29.77                         | 2.29  | *  |
| PA121    | 0 mg.kg <sup>-1</sup>  | 30                      | 0.82                         | 0.18  |    | 1.54                         | 0.50  |    | 1.12                         | 0.25  |    | 1.07                          | 0.20  |    |
|          |                        | 60                      | 0.31                         | 0.03  |    | 0.58                         | 0.18  |    | 0.53                         | 0.15  |    | 0.42                          | 0.09  |    |
|          |                        | 90                      | 0.29                         | 0.02  |    | 0.24                         | 0.01  |    | 0.23                         | 0.04  |    | 0.27                          | 0.01  |    |
|          | 6 mg.kg <sup>-1</sup>  | 30                      | 21.59                        | 4.81  | *  | 20.48                        | 5.34  | *  | 46.86                        | 5.21  | *  | 21.07                         | 4.41  | *  |
|          |                        | 60                      | 5.03                         | 0.46  | ** | 7.81                         | 1.13  | *  | 62.44                        | 7.67  | *  | 6.26                          | 0.75  | *  |
|          |                        | 90                      | 7.00                         | 0.30  | ** | 33.74                        | 4.92  | *  | 10.82                        | 1.40  | *  | 19.91                         | 2.00  | *  |
|          | 12 mg.kg <sup>-1</sup> | 30                      | 8.15                         | 0.90  |    | 23.15                        | 4.65  |    | 166.43                       | 17.46 | *  | 13.11                         | 1.85  |    |
|          |                        | 60                      | 6.29                         | 1.50  |    | 9.74                         | 1.60  |    | 75.62                        | 6.86  |    | 7.88                          | 1.52  |    |
|          |                        | 90                      | 15.96                        | 1.97  | *  | 86.85                        | 5.79  | *  | 18.85                        | 1.47  | ** | 52.75                         | 2.33  | ** |
| PA150    | 0 mg.kg <sup>-1</sup>  | 30                      | 0.47                         | 0.05  |    | 0.75                         | 0.10  |    | 0.59                         | 0.03  |    | 0.58                          | 0.05  |    |
|          |                        | 60                      | 0.28                         | 0.05  |    | 0.37                         | 0.05  |    | 0.30                         | 0.03  |    | 0.32                          | 0.05  |    |
|          |                        | 90                      | 0.44                         | 0.05  |    | 0.26                         | 0.03  |    | 0.30                         | 0.01  |    | 0.36                          | 0.02  |    |
|          | 6 mg.kg <sup>-1</sup>  | 30                      | 4.26                         | 0.43  | ** | 7.30                         | 1.45  | *  | 16.25                        | 3.06  | *  | 5.39                          | 0.33  | ** |
|          |                        | 60                      | 21.90                        | 1.85  | ** | 8.51                         | 1.62  | *  | 12.88                        | 3.07  | *  | 15.23                         | 1.12  | ** |
|          |                        | 90                      | 93.78                        | 8.35  | ** | 38.30                        | 6.63  | *  | 10.81                        | 0.74  | ** | 67.63                         | 2.53  | ** |
|          | 12 mg.kg <sup>-1</sup> | 30                      | 4.64                         | 0.45  |    | 7.88                         | 1.31  |    | 29.81                        | 3.32  | *  | 5.97                          | 0.61  |    |
|          |                        | 60                      | 103.95                       | 21.75 | *  | 8.69                         | 1.87  |    | 17.28                        | 3.10  | *  | 61.43                         | 13.24 |    |
|          |                        | 90                      | 110.64                       | 15.29 |    | 126.63                       | 7.88  | *  | 12.51                        | 1.36  |    | 118.67                        | 11.47 | *  |
| PA46     | Control                | 30                      | 0.69                         | 0.17  |    | 0.69                         | 0.10  |    | 0.84                         | 0.17  |    | 0.68                          | 0.14  |    |
|          |                        | 60                      | 0.47                         | 0.02  |    | 0.31                         | 0.05  |    | 0.32                         | 0.06  |    | 0.40                          | 0.01  |    |
|          |                        | 90                      | 0.46                         | 0.06  |    | 0.31                         | 0.04  |    | 0.37                         | 0.06  |    | 0.39                          | 0.05  |    |
|          | 6 mg.Kg <sup>-1</sup>  | 30                      | 5.43                         | 1.57  |    | 20.34                        | 3.41  | *  | 58.65                        | 6.33  | ** | 11.33                         | 2.36  | *  |
|          |                        | 60                      | 4.23                         | 0.82  | *  | 12.95                        | 2.83  | *  | 36.67                        | 4.63  | *  | 7.95                          | 1.38  | *  |
|          |                        | 90                      | 7.20                         | 1.25  | *  | 25.49                        | 2.94  | ** | 9.58                         | 1.22  | *  | 15.78                         | 1.79  | ** |
|          | 12 mg.Kg <sup>-1</sup> | 30                      | 13.56                        | 1.36  | ** | 72.46                        | 5.99  | *  | 16.74                        | 2.94  | *  | 37.18                         | 2.46  | ** |
|          |                        | 60                      | 14.33                        | 2.10  | *  | 50.70                        | 8.11  | *  | 16.83                        | 2.28  | *  | 30.40                         | 5.03  | *  |
|          |                        | 90                      | 24.89                        | 3.78  | *  | 18.52                        | 3.63  |    | 15.65                        | 3.38  |    | 21.56                         | 1.65  |    |
| SCC85    | 0 mg.kg <sup>-1</sup>  | 30                      | 0.46                         | 0.15  |    | 0.82                         | 0.07  |    | 1.35                         | 0.12  |    | 0.61                          | 0.11  |    |
|          |                        | 60                      | 0.56                         | 0.12  |    | 0.36                         | 0.04  |    | 0.24                         | 0.01  |    | 0.47                          | 0.08  |    |
|          |                        | 90                      | 0.41                         | 0.06  |    | 0.49                         | 0.07  |    | 0.37                         | 0.04  |    | 0.45                          | 0.05  |    |
|          | 6 mg.kg <sup>-1</sup>  | 30                      | 8.37                         | 0.45  | ** | 22.31                        | 2.05  | ** | 113.60                       | 10.43 | ** | 13.92                         | 1.04  | ** |
|          |                        | 60                      | 4.13                         | 0.66  | *  | 6.97                         | 0.99  | *  | 46.01                        | 6.68  | *  | 5.43                          | 0.16  | ** |
|          |                        | 90                      | 7.69                         | 0.41  | ** | 73.34                        | 4.73  | ** | 14.92                        | 3.25  | *  | 40.88                         | 3.62  | ** |
|          | 12 mg.kg <sup>-1</sup> | 30                      | 7.45                         | 0.31  |    | 28.49                        | 3.27  |    | 136.07                       | 11.65 |    | 15.22                         | 1.54  |    |
|          |                        | 60                      | 10.27                        | 1.85  | *  | 19.72                        | 3.82  |    | 75.54                        | 13.47 |    | 14.57                         | 1.96  | *  |
|          |                        | 90                      | 14.79                        | 1.46  | *  | 131.13                       | 6.64  | ** | 23.17                        | 3.49  |    | 74.51                         | 6.00  | *  |
| SCC86    | 0 mg.kg <sup>-1</sup>  | 30                      | 0.70                         | 0.26  |    | 0.73                         | 0.09  |    | 0.79                         | 0.14  |    | 0.70                          | 0.20  |    |
|          |                        | 60                      | 0.60                         | 0.17  |    | 0.50                         | 0.14  |    | 0.49                         | 0.08  |    | 0.55                          | 0.15  |    |
|          |                        | 90                      | 0.58                         | 0.04  |    | 0.32                         | 0.07  |    | 0.41                         | 0.07  |    | 0.44                          | 0.06  |    |
|          | 6 mg.kg <sup>-1</sup>  | 30                      | 5.09                         | 1.12  | *  | 14.89                        | 0.65  | ** | 95.16                        | 7.70  | ** | 8.68                          | 0.61  | ** |
|          |                        | 60                      | 3.89                         | 0.69  | *  | 6.84                         | 1.09  | *  | 26.58                        | 1.95  | ** | 5.28                          | 0.89  | *  |
|          |                        | 90                      | 6.26                         | 0.24  | ** | 65.22                        | 3.99  | ** | 10.69                        | 1.40  | *  | 35.62                         | 1.25  | ** |
|          | 12 mg.kg <sup>-1</sup> | 30                      | 9.41                         | 2.06  | *  | 27.32                        | 1.72  | *  | 122.78                       | 9.74  | ** | 15.79                         | 1.79  | *  |
|          |                        | 60                      | 8.21                         | 1.15  | *  | 14.89                        | 0.87  | ** | 97.89                        | 11.39 | *  | 10.92                         | 1.15  | ** |
|          |                        | 90                      | 13.55                        | 0.47  | ** | 86.47                        | 8.11  |    | 16.17                        | 1.64  | *  | 48.80                         | 4.04  |    |

<sup>a</sup> mg Cd kg<sup>-1</sup> DW

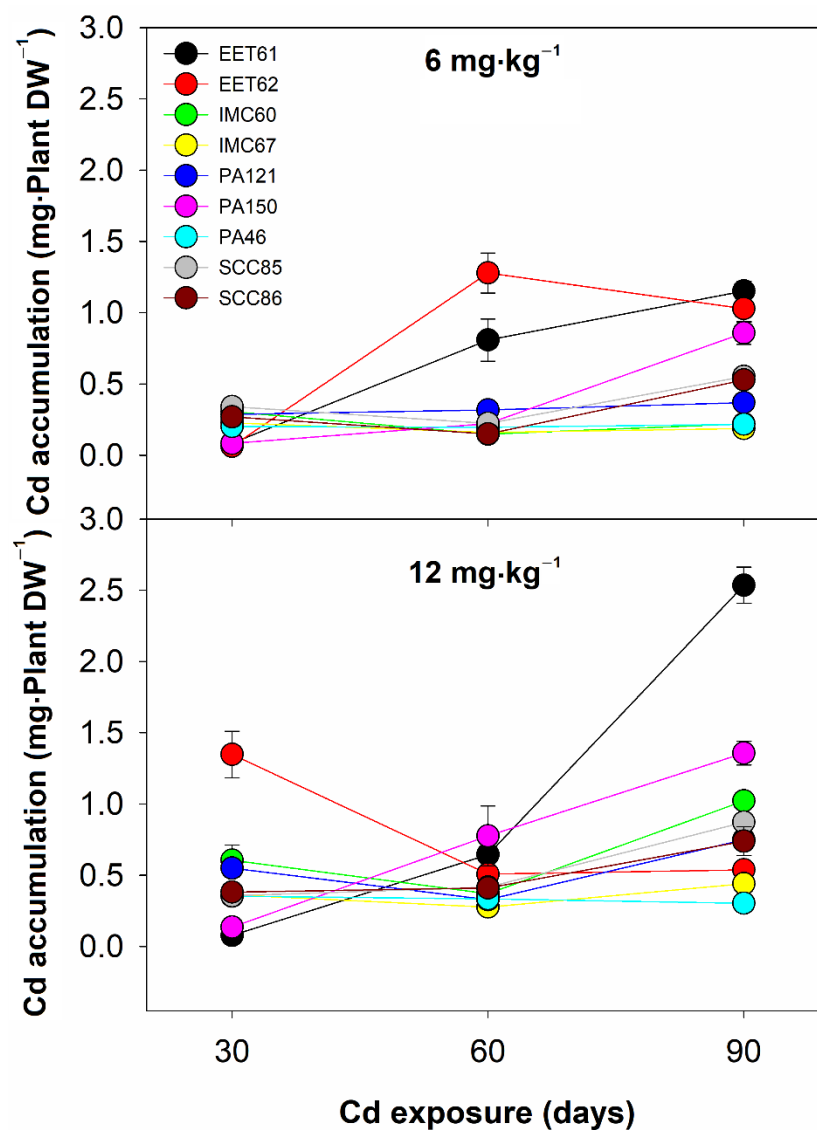

**Figure S5.** Total cadmium accumulated per plant in different genotypes of cacao rootstock over time. Values of total cadmium accumulated per plant are obtained from the sum of the accumulated values in each part of the plant (leaves, stems, and roots). The cadmium values allocated to each plant part are obtained through the relationship between concentration (mg·kg<sup>-1</sup>) and dry mass (kg DW) of each plant part, respectively. Circles represent mean ( $n=3$ ), and bars represent standard error of mean (SEM).
